# Supplementary material
Source: bioRxiv or medRxiv preprint supplement (https://www.biorxiv.org/highwire/filestream/139661/field_highwire_adjunct_files/0/466151-1.pdf)
Supplement: Supplementary file [file 466151-1.pdf]

# 1 Methods

## 1.1 Data Collection

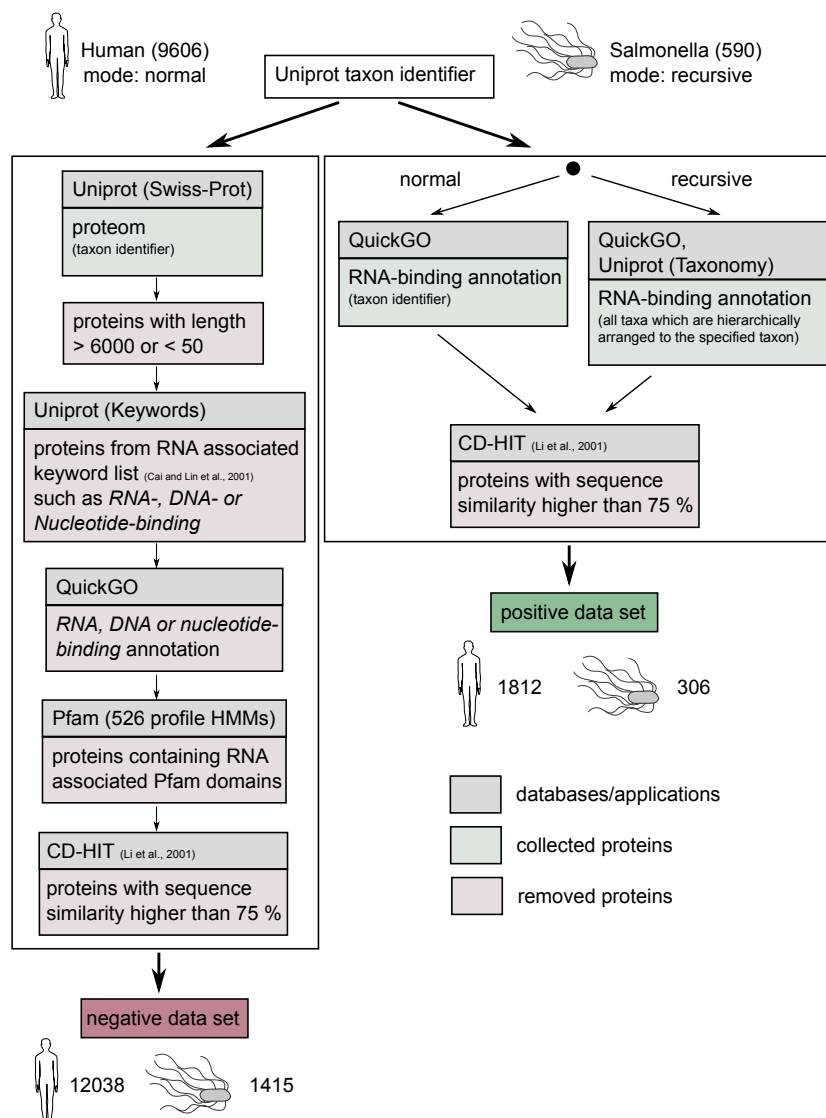

Figure S1: **Pipeline to collect RBPs (positive data) and non-RBPs (negative data).** The fully automated pipeline requires the Uniprot identification number of a taxon to collect positive and negative data sets. The data sets form the foundation to train and validate the TriPepSVM classifier. The pipeline supports a recursive mode to collect positive data from all members of the specified taxon. In the figure we see the results for human (9606, normal mode) and Salmonella (590, recursive mode). Red boxes in the workflow correspond to filtering operations on the input sequences, while green boxes correspond to collection steps on the input sequences.

## 1.2 Parameter Tuning

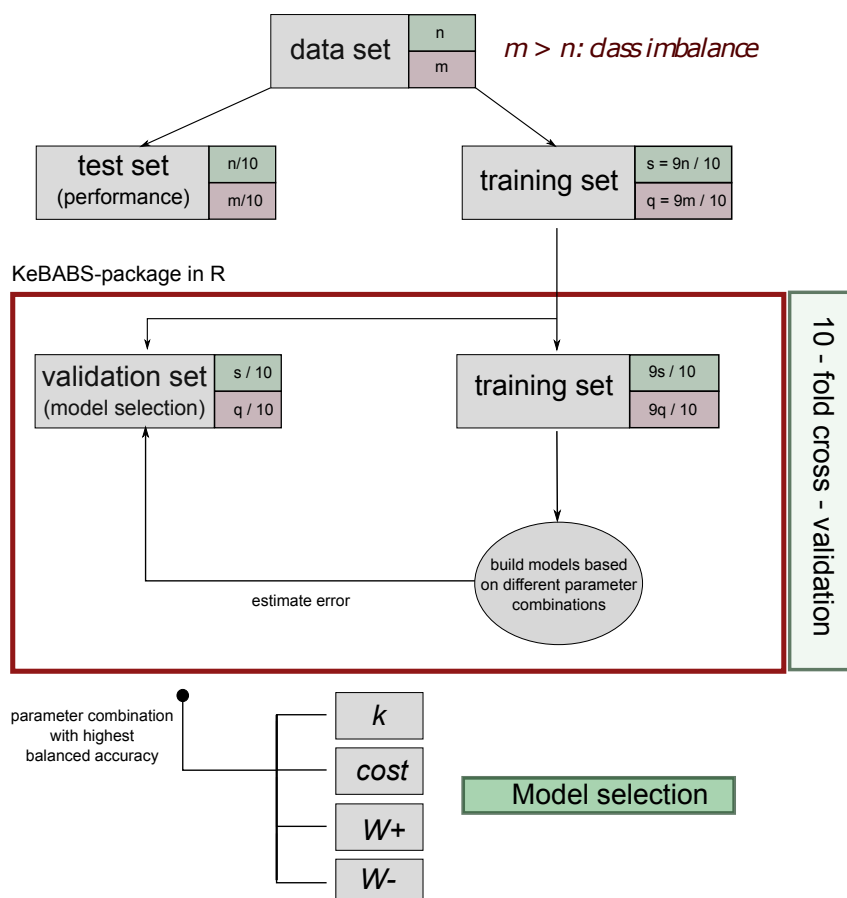

Figure S2: **Data splitting and parameter tuning.** The collected positive and negative proteins are pictured as data sets with  $n$  positive and  $m$  negative elements. Those collected data sets present class imbalance, containing much more negative than positive examples. Firstly, we split the data set into training (90 %) and test set (10 %). We apply the *KeBABS R* package to perform a 10-fold cross-validation to identify parameters  $k$  and  $cost$ . Subsequently, the parameter combination resulting in the smallest average balanced accuracy is selected. We run a separate outer loop for the selection of a good combination of weights for the positive and negative class. The final classifier is trained using the combination of hyper parameters that achieves maximum average balanced accuracy.

## 1.3 Performance Metrics

To evaluate the performance of our classifier and the other RBP prediction methods we computed the True Positives (TP) as the correctly identified RBPs, the False Positives (FP) as those proteins misclassified as RBPs, the True Negatives (TN) as those proteins which are correctly identified as non-RBPs and the False Negatives (FN) as those undetected RBPs. These values are then used to compute several performance metrics in order to compare TriPepSVM to previous approaches. We mainly compute the area under the precision-recall curve (AUPR) and the area under the

receiver operating characteristic curve (AUROC) (figure 2 in the main article). In addition, we computed the balanced accuracy (BACC) to account for class imbalance, sensitivity, specificity and matthews correlation coefficient (MCC). AUPR, AUROC, BACC and MCC are explained more in detail below.

### 1.3.1 Area under the Precision-Recall Curve (AUPR)

The area under the precision-recall curve is a classifier’s performance metric independent from the chosen cutoff to classify examples in the positive or the negative class. In particular, when a classifier outputs a probability or any other continuous value (for instance the distance of a vector from the decision boundary of an SVM), one can compute pairs of precision and recall for all possible cutoffs. This function of the cutoff can be plotted and is commonly referred to as the precision-recall curve (PR-curve). The best possible PR-curve goes from the upper left corner (perfect precision with no recall) straight to the upper right corner (perfect precision with perfect recall), and then it falls to the bottom right corner (perfect recall with no precision). Such an ideal PR-curve has an area under the curve of 1. A random classifier has a AUPR given by the fraction of positives examples in the dataset.

PR-curves have also the advantage to account for class imbalance. In fact, a classifier that appears to perform well in the balanced setting might be nearly useless in the unbalanced setting, because it is very hard to control the number of false positives in such a situation. To circumvent this, PR-curves plot the fraction of predicted example (in this case RBPs) that are true (precision) versus the fraction of all true RBPs that are predicted as RPBs (recall) at different cutoff scores.

### 1.3.2 Area under the receiver operating characteristic curve (AUROC)

Similar to the precision-recall curve, it is possible to investigate the true positive rate (TPR), given by the number of true positives over the total number of positives, and the false positive rate (FPR), given by the number of false positives over the total number of negatives, as a function of all thresholds. This is referred to as the receiver operating characteristic curve (ROC curve), where the FPR is on the x-axis and the TPR on the y-axis. The ideal curve goes from the lower left corner (no false positives and no true positives) straight to the upper left corner (no false positives but perfect true positives) and then to the upper right corner. Similar to the PR curve, the area under the perfect ROC curve is 1. A random guess at a certain cutoff score would give a point along the diagonal line and therefore the AUROC of a random classifier is 0.5. ROC curves have the advantage to be independent of a specific cutoff but do not account for class imbalance.

### 1.3.3 Balanced Accuracy

Balanced accuracy (BACC) is a special form of accuracy which tries to account for a case where the classes are not balanced in a dataset. BACC is given by the equation:

$$BACC = \frac{\left(\frac{TP}{P} + \frac{TN}{N}\right)}{2} \tag{1}$$

Hence, BACC is essentially the mean of TPR and specificity and it is dependent on the chosen cutoff score to classify examples in the positive or the negative class.

### 1.3.4 Matthews Correlation Coefficient (MCC)

The matthews correlation coefficient computes the correlation coefficient between the true labels and the observed classification results. As the correlation coefficient, it returns a value between

-1 and 1 with 0 corresponding to no correlation at all (random performance).

MCC is suited for situations in which the classes are not balanced but it depends on choosing a specific cutoff. MCC is defined as:

$$MCC = \frac{TP \times TN - FP \times FN}{\sqrt{(TP + FP)(TP + FN)(TN + FP)(TN + FN)}}. \quad (2)$$

## 1.4 Choosing Optimal Cutoff Values

In order to enable a fair comparison between all four tools and to be consistent with our proteome-wide predictions, we compute optimal cutoff values from the PR-curves of all classifiers except SPOT-seq RNA. We obtain the optimal cutoff by computing the point on the PR curve that is closest to the optimal curve in euclidean space. For a given cutoff  $t$ , we define the resulting precision and recall of a classifier under  $t$  as  $pr_c(t)$  and  $rec_c(t)$ , respectively. We can then define the optimal cutoff for a classifier  $c$  as:

$$\hat{T}_c = \underset{t}{arg \min} \left( \sqrt{(1 - rec_c(t))^2 + (1 - pr_c(t))^2} \right) \quad (3)$$

To enable a fair comparison, we compute this optimal cutoff for all compared methods to obtain the results of figure S4.

## 1.5 Cell Culture & Molecular Biology

### 1.5.1 Construction of bacterial strains

To tag candidate RBPs, a x3FLAG::KmR cassette was inserted into the genomic loci of the respective genes of *Salmonella* Typhimurium SL1344. The gene::x3FLAG::KmR was constructed following the procedure based on the Lambda Red system developed by Datsenko and Wanner. The system is based on two plasmids: pKD46, a temperature-sensitive plasmid that carries gamma, beta and exo genes (the bacteriophage  $\lambda$  red genes) under the control of an Arabinose-inducible promoter, and pSUB11, carrying the x3FLAG::KmR cassette. The cassette in pSUB11 was PCR-amplified with primers (see Table S3), the 5 ends of which were designed to target the 3end of the gene of interest (C-terminal tag), digested with DpnI at 37°C for one hour and, upon purification, used for subsequent electroporation. *Salmonella* Typhimurium SL1344 harbouring plasmid pKD46 was grown in LB containing Ampicillin (100  $\mu$ g/ml) and L-Arabinose (100 mM) at 30°C to an OD<sub>600</sub> of 0.8. Cells were incubated on ice for 15 min, and centrifuged for 30 min at 3220 x g at 4°C and resuspended in ice-cold water. The wash was repeated three times. On the final wash, cells were resuspended in 300  $\mu$ l water and electroporated with 200 ng of PCR product. Cells were recovered for one hour in LB at 37°C on a tabletop thermomixer at 600 rpm, plated on LB agar with Kanamycin (50  $\mu$ g/ml) overnight. The following day, 10 colonies per strain were picked, resuspended in PBS and streaked on plates containing Ampicillin or Kanamycin and incubated at 40°C. Colonies that showed resistance to Kanamycin but not to Ampicillin were selected for further analysis, and the correct expression of the epitope tag was verified by western blot.

### 1.5.2 Immunoprecipitation

Cell pellets were resuspended in 800 0.2 $\mu$ l NP-T buffer (50 mM NaH<sub>2</sub>PO<sub>4</sub>, 300 mM NaCl, 0.05% Tween, pH 8.0) together with 1 ml glass beads (0.1 mm). Cells were lysed by shaking at 30 Hz for 15 min at 4°C and centrifuged for 15 min at 16,000 g and 4°C. Cell lysates were transferred to new tubes and centrifuged for 15 min at 16,000 g and 4°C. The cleared lysates were mixed with one volume of NP-T buffer with 8 M urea, incubated for 5 min at 65°C in a thermomixer with

shaking at 900 rpm and diluted 10 in ice-cold NP-T buffer. Anti-FLAG magnetic beads (Sigma) were washed three times in NP-T buffer (30 0.2 $\mu$ l 50% bead suspension was used for a lysate from 100 ml bacterial culture), added to the lysate, and the mixture was rotated for one hour at 4°C. Beads were collected by centrifugation at 800 g, resuspended in 1 ml NP-T buffer, transferred to new tubes, and washed 2 with high-salt buffer (50 mM NaH<sub>2</sub>PO<sub>4</sub>, 1 M NaCl, 0.05% Tween, pH 8.0) and 2 with NP-T buffer. Beads were resuspended in 100 0.2 $\mu$ l NP-T buffer containing 1 mM MgCl<sub>2</sub> and 2.5 U benzonase nuclease (Sigma) and incubated for 10 min at 37°C in a thermomixer with shaking at 800 rpm, followed by a 2-min incubation on ice. After one wash with high-salt buffer and two washes with CIP buffer (100 mM NaCl, 50 mM TrisHCl pH 7.4, 10 mM MgCl<sub>2</sub>), the beads were resuspended in 100 0.2 $\mu$ l CIP buffer with 10 units of calf intestinal alkaline phosphatase (NEB) and incubated for 30 min at 37°C in a thermomixer with shaking at 800 rpm. This was followed by one wash with high-salt buffer and two washes with PNK buffer (50 mM TrisHCl pH 7.4, 10 mM MgCl<sub>2</sub>, 0.1 mM spermidine).

### 1.5.3 PNK assay

After one wash with high-salt buffer and two washes with CIP buffer (100 mM NaCl, 50 mM TrisHCl pH 7.4, 10 mM MgCl<sub>2</sub>), the beads were resuspended in 100  $\mu$ l CIP buffer with 10 units of calf intestinal alkaline phosphatase (NEB) and incubated for 30 min at 37°C in a thermomixer with shaking at 800 rpm. This was followed by one wash with high-salt buffer and two washes with PNK buffer (50 mM TrisHCl pH 7.4, 10 mM MgCl<sub>2</sub>, 0.1 mM spermidine). Next, beads were resuspended in 100  $\mu$ l PNK buffer and 1 U T4 PNK (0.1 U/ $\mu$ l, NEB) and 5.5  $\mu$ Ci <sup>32</sup> $\gamma$ P-ATP were added and incubated at 37°C for 30 min. The beads were then washed twice in PNK buffer and resuspended in 50  $\mu$ l of a 2x denaturing gel loading buffer (Invitrogen). 30  $\mu$ l samples were then analysed on a NuPAGE Bis-Tris gel (Invitrogen) and radioactive signal was detected in a Life Science FLA-5100 imaging system (Fujifilm).

Table S1: Strains used in this study. *Salmonella enterica* subsp.*enterica* serovar Typhimurium

| Strain name | Genotype                         | Source                |
|-------------|----------------------------------|-----------------------|
| SL1344      | <i>rpsL hisG</i>                 | Holmqvist et al. 2016 |
| JVS-04317   | <i>SL1344 csrA-3xFLAG KanR</i>   | Holmqvist et al. 2016 |
| ST-BB-2024  | <i>SL1344 dnaJ::FLAGx3::KanR</i> | This study            |
| ST-BB-2025  | <i>SL1344 clpX::FLAGx3::KanR</i> | This study            |
| ST-BB-2026  | <i>SL1344 ubiG::FLAGx3::KanR</i> | This study            |
| ST-BB-2010  | <i>SL1344 cysN::FLAGx3::KanR</i> | This study            |
| ST-BB-2004  | <i>SL1344 yigA::FLAGx3::KanR</i> | This study            |

Table S2: Plasmids used in this study.

| Name   | Details                                                                                                                                                    | Source                 |
|--------|------------------------------------------------------------------------------------------------------------------------------------------------------------|------------------------|
| pSUB11 | <i>Km<sup>R</sup>, 3xFLAG</i>                                                                                                                              | Uzzau et al. 2001      |
| pKD46  | <i>oriR(ColE1) repA101ts araC bla; contains <math>\gamma</math>, <math>\beta</math> and <i>exo</i> genes of the <math>\lambda</math> red bacteriophage</i> | Datsenko & Wanner 2000 |

Table S3: Primers used in this study.

| Name               | Sequence 5'-3' (in <b>bold</b> the portion annealing to the template, pSUB11)            | Source     |
|--------------------|------------------------------------------------------------------------------------------|------------|
| p354-clpX-FLAG-fwd | GCTGATTTACGGCAAACCGGAAGCGCAGGCTTCTGGC<br>GAAG <b>ACTACAAAGACCATGACG</b>                  | This study |
| p355-clpX-FLAG-rev | ATCCCCCTTTTGGCTAACTGATTGTATGAATGTTT<br>AAC <b>CATATGAATATCCTCCTTAG</b>                   | This study |
| p181-cysN-FLAG-fwd | GGACGCCCGAGATTGCTGGGAGATAAACATGGCGCT<br>GCA <b>GA</b> CTACAAAGACCATGACG                  | This study |
| p182-cysN-FLAG-rev | GGCGACAGTAACGGGATGAGAGTGCCAGACCACGTTC<br>TCATCATGCAGCGCCATGC <b>CATATGAATATCCTCCTTAG</b> | This study |
| p350-dnaJ-FLAG-fwd | CTTTGACGGCGTGAAAAAATTTCTTTGACGATTTGACT<br>CG <b>GA</b> CTACAAAGACCATGACG                 | This study |
| p351-dnaJ-FLAG-rev | GATATACACCCGGGCTGAAGAAAAATACAACGGGAAAA<br>G <b>ACATATGAATATCCTCCTTAG</b>                 | This study |
| p358-ubiG-FLAG-fwd | AGACGTTAACTACATGTTGCATACCCGCGCTAAAAAAG<br>CC <b>GA</b> CTACAAAGACCATGACG                 | This study |
| p359-ubiG-FLAG-rev | CGATGATCTAACGCAACCCTTATAGGAAAATTTCTTTGA<br>T <b>GCATATGAATATCCTCCTTAG</b>                | This study |
| p157-YigA-FLAG-fwd | GATGCTGCCGGAAGCTGCTGGAACGCTGGATTAAACGCG<br>T <b>AGACTACAAAGACCATGACG</b>                 | This study |
| p158-YigA-FLAG-rev | CGCAGGAACCGGAGACATCCTGAGAAAAGCGGACATC<br>CGT <b>CACATATGAATATCCTCCTTAG</b>               | This study |

## 2 Results

### 2.1 Parameter Tuning of TriPepSVM

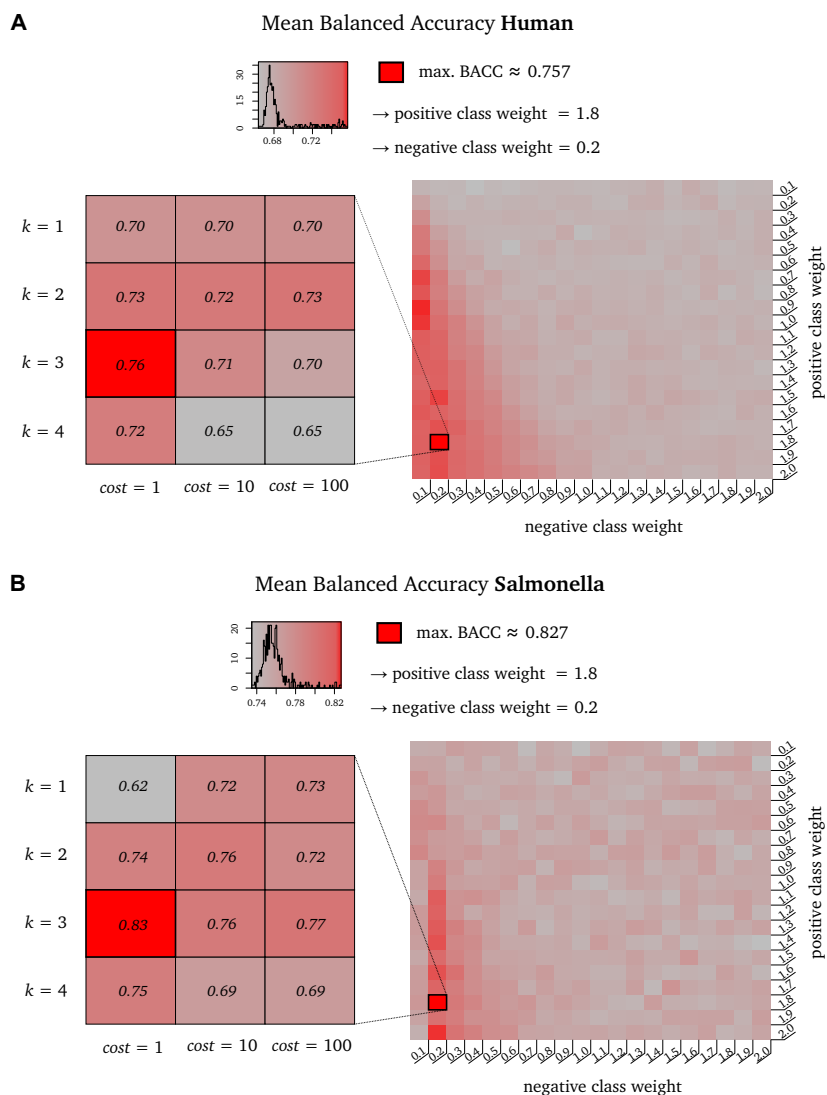

Figure S3: **Parameter tuning results.** The parameter tuning results are shown in for (A) human and (B) *Salmonella*, respectively. The heatmaps on the right hand side show the best average balanced accuracy value for all class weight combinations of  $W_+ = W_- = 0.1, \dots, 2$ . Each cell represents a parameter tuning experiment with fixed class weights but different combinations of  $k$  and  $cost$ . We detect for both taxa the optimal class weights of  $W_+ = 1.8$  and  $W_- = 0.2$ . The heatmaps on the left hand side report the average balanced accuracy for different combinations of  $k = 1, 2, 3, 4$  and  $cost = 1, 10, 100$ , at fixed values of  $W_+$  and  $W_-$ . The 10-fold cross-validation reports  $k = 3$  and  $cost = 1$  as optimal hyper parameters for both human and *Salmonella*.



## 2.2 Performance Comparison

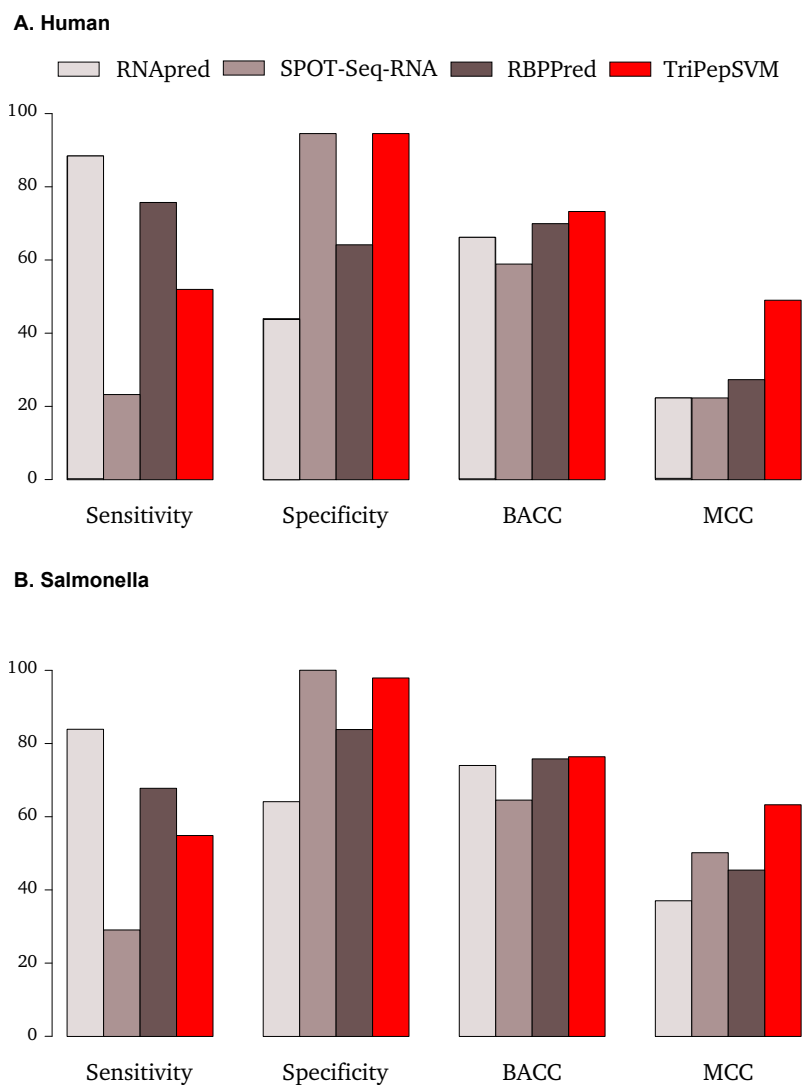

Figure S4: **Performance comparison between different methods.** The figure illustrates the performance comparisons between previously developed computational prediction methods (RNApred, SPOT-Seq-RNA, RBPPred) and our tool TriPepSVM. The performance measurements are computed on the test data set using the optimal thresholds for each taxon and tool, determined as described in subsection 1.4 of this file. The figure depicts the achieved sensitivity, specificity, balanced accuracy and MCC for all applications. TripepSVM performs with the best balanced accuracy and MCC in in (A) human and (B) Salmonella.

Table S4: Uniprot keywords used to remove nucleotide-binding associated proteins.

| Uniprot Keyword           | Definition                                                                                                                                                                                                                                                                                                                                                                                                                                                                                                                                                 | ID      |
|---------------------------|------------------------------------------------------------------------------------------------------------------------------------------------------------------------------------------------------------------------------------------------------------------------------------------------------------------------------------------------------------------------------------------------------------------------------------------------------------------------------------------------------------------------------------------------------------|---------|
| Activator                 | Protein that positively regulates either the transcription of one or more genes, or the translation of mRNA.                                                                                                                                                                                                                                                                                                                                                                                                                                               | KW-0010 |
| ADP-ribosylation          | Protein which is post-translationally modified by the attachment of at least one ADP-ribosyl group.                                                                                                                                                                                                                                                                                                                                                                                                                                                        | KW-0013 |
| Chromatin regulator       | Protein controlling the opening or closing of chromatin.                                                                                                                                                                                                                                                                                                                                                                                                                                                                                                   | KW-0156 |
| Chromosome partition      | Protein involved in chromosome partition, the process by which newly replicated plasmids and chromosomes are actively segregated prior to cell division.                                                                                                                                                                                                                                                                                                                                                                                                   | KW-0159 |
| Nucleosome core           | Protein characteristic of the nucleosome, a repeating structural unit in chromatin that packages DNA to give the chromatin a 'beads-on-a-string' appearance.                                                                                                                                                                                                                                                                                                                                                                                               | KW-0544 |
| Chromosome                | Protein which is associated with chromosomal DNA, including histones, protamines and high mobility group proteins.                                                                                                                                                                                                                                                                                                                                                                                                                                         | KW-0158 |
| Endonuclease              | Phosphodiesterase capable of cleaving at phosphodiester internal bonds within a DNA or RNA substrate.                                                                                                                                                                                                                                                                                                                                                                                                                                                      | KW-0255 |
| Excision nuclease         | Enzyme which excises abnormal or mismatched nucleotides from a DNA strand.                                                                                                                                                                                                                                                                                                                                                                                                                                                                                 | KW-0267 |
| Exonuclease               | Enzyme that degrades DNA or RNA by progressively splitting off single nucleotides from one end of the chain.                                                                                                                                                                                                                                                                                                                                                                                                                                               | KW-0269 |
| Helicase                  | Protein with an helicase activity. Helicases are ATPases that catalyze the unwinding of double-stranded nucleic acids. They are tightly integrated (or coupled) components of various macromolecular complexes which are involved in processes such as DNA replication, recombination, and nucleotide excision repair, as well as RNA transcription and splicing.                                                                                                                                                                                          | KW-0347 |
| Intron homing             | Endonucleases involved in intron homing, a genetic event leading to the transfer of an intron DNA sequence. This type of intron mobility depends on site-specific restriction endonucleases encoded by the mobile introns.                                                                                                                                                                                                                                                                                                                                 | KW-0404 |
| Isomerase                 | Enzyme that catalyzes the 1,1-, 1,2- or 1,3-hydrogen shift. The 1,1-hydrogen shift is an inversion at an asymmetric carbon center (racemases, epimerases). The 1,2-hydrogen shift involved a hydrogen transfer between two adjacent carbon atoms, one undergoing oxidation, the other reduction (aldose-ketose isomerases). The 1,3-hydrogen shifts are allylic or azaallylic (when nitrogen is one of the three atoms) isomerizations.                                                                                                                    | KW-0413 |
| Nuclease                  | Enzyme that degrades nucleic acids into shorter oligonucleotides or single nucleotide subunits by hydrolyzing sugar-phosphate bonds in the nucleic acid backbone.                                                                                                                                                                                                                                                                                                                                                                                          | KW-0540 |
| Spliceosome               | Protein of the spliceosome, a very large complex of small nuclear RNA/protein particles (snRNPs) which assemble with pre-mRNA to achieve RNA splicing.                                                                                                                                                                                                                                                                                                                                                                                                     | KW-0747 |
| Topoisomerase             | Enzymes capable of altering the degree of supercoiling of double-stranded DNA molecules. Various topoisomerases can increase or relax supercoiling, convert single-stranded rings to intertwined double-stranded rings, tie and untie knots in single stranded and duplex rings or catenate and decatenate duplex rings. Any enzyme that cleaves only one strand of a DNA duplex and then reseals it is classified as a type I topoisomerase (Topo I). Type II topoisomerases (Topo II) change DNA topology by breaking and rejoining double-stranded DNA. | KW-0799 |
| Transcription             | Protein involved in the transfer of genetic information from DNA to messenger RNA (mRNA) by DNA-directed RNA polymerase. In the case of some RNA viruses, protein involved in the transfer of genetic information from RNA to messenger RNA (mRNA) by RNA-directed RNA polymerase.                                                                                                                                                                                                                                                                         | KW-0804 |
| Transcription regulation  | Protein involved in the regulation of the transcription process.                                                                                                                                                                                                                                                                                                                                                                                                                                                                                           | KW-0805 |
| Transcription termination | Protein involved in transcription termination.                                                                                                                                                                                                                                                                                                                                                                                                                                                                                                             | KW-0806 |
| Translation regulation    | Protein involved in the regulation of the transcription process.<br>Category                                                                                                                                                                                                                                                                                                                                                                                                                                                                               | KW-0810 |
| DNA-binding               | Protein which binds to DNA, typically to pack or modify the DNA, or to regulate gene expression. Among those proteins that recognize specific DNA sequences, there are a number of characteristic conserved motifs believed to be essential for specificity. Many DNA-binding domains are described in PROSITE.                                                                                                                                                                                                                                            | KW-0238 |

|                           |     |                                                                                                                                                                                                                                                                                                                                                                                                                                                                                                                                                                                                                                                                              |         |
|---------------------------|-----|------------------------------------------------------------------------------------------------------------------------------------------------------------------------------------------------------------------------------------------------------------------------------------------------------------------------------------------------------------------------------------------------------------------------------------------------------------------------------------------------------------------------------------------------------------------------------------------------------------------------------------------------------------------------------|---------|
| DNA damage                |     | Protein induced by DNA damage or protein involved in the response to DNA damage. Drug- or radiation-induced injuries in DNA introduce deviations from its normal double-helical conformation. These changes include structural distortions which interfere with replication and transcription, as well as point mutations which disrupt base pairs and exert damaging effects on future generations through changes in DNA sequence. Response to DNA damage results in either repair or tolerance.                                                                                                                                                                           | KW-0227 |
| DNA excision              |     | Protein involved in the repair of damages to one strand of DNA (loss of purines due to thermal fluctuations, formation of pyrimidine dimers by UV irradiation, for instance). The site of damage is recognized, excised by an endonuclease, the correct sequence is copied from the complementary strand by a polymerase and the ends of this correct sequence are joined to the rest of the strand by a ligase. In bacterial systems, the polymerase also acts as endonuclease. Excisase A and other proteins involved in recombination mediate DNA excision; a process whereby abnormal or mismatched nucleotides are enzymatically cut out of a strand of a DNA molecule. | KW-0228 |
| DNA integration           |     | Protein involved in DNA integration, a process that mediates the insertion of foreign genetic material, or other duplex DNA, into a chromosome, or another replicon, in order to form a covalently linked DNA continuous with the host DNA.                                                                                                                                                                                                                                                                                                                                                                                                                                  | KW-0229 |
| DNA repair                |     | Protein involved in the repair of DNA, the various biochemical processes by which damaged DNA can be restored. DNA repair embraces, for instance, not only the direct reversal of some types of damage (such as the enzymatic photoreactivation of thymine dimers), but also multiple distinct mechanisms for excising damaged base; termed nucleotide excision repair (NER), base excision repair (BER) and mismatch repair (MMR); or mechanisms for repairing double-strand breaks.                                                                                                                                                                                        | KW-0234 |
| DNA replication           |     | Protein involved in DNA replication, i.e. the duplication of DNA by making a new copy of an existing molecule. The parental double-stranded DNA molecule is replicated semi conservatively, i.e. each copy contains one of the original strands paired with a newly synthesized strand that is complementary in terms of AT and GC base pairing.                                                                                                                                                                                                                                                                                                                             | KW-0235 |
| DNA replication inhibitor |     | Protein involved in the inhibition of DNA replication.                                                                                                                                                                                                                                                                                                                                                                                                                                                                                                                                                                                                                       | KW-0236 |
| DNA synthesis             |     | Protein involved in the synthesis of DNA from deoxyribonucleic acid monomers.                                                                                                                                                                                                                                                                                                                                                                                                                                                                                                                                                                                                | KW-0237 |
| DNA recombination         |     | Protein involved in DNA recombination, i.e. any process in which DNA molecules are cleaved and the fragments are rejoined to give a new combination.                                                                                                                                                                                                                                                                                                                                                                                                                                                                                                                         | KW-0233 |
| DNA-directed polymerase   | DNA | Enzyme that catalyzes DNA synthesis by addition of deoxyribonucleotide units to a DNA chain using DNA as a template. They can also possess exonuclease activity and therefore function in DNA repair.                                                                                                                                                                                                                                                                                                                                                                                                                                                                        | KW-0239 |
| DNA-directed polymerase   | RNA | Protein of the DNA-directed RNA polymerase complexes, which catalyze RNA synthesis the by addition of ribonucleotide units to a RNA chain using DNA as a template. They can initiate a chain de novo. Prokaryotes have a single enzyme for the three RNA types that is subject to stringent regulatory mechanisms. Eukaryotes have type I that synthesizes all rRNA except the 5S component, type II that synthesizes mRNA and hnRNA and type III that synthesizes tRNA and the 5S component of rRNA.                                                                                                                                                                        | KW-0240 |
| RNA-binding               |     | Protein which binds to RNA.                                                                                                                                                                                                                                                                                                                                                                                                                                                                                                                                                                                                                                                  | KW-0694 |
| RNA-directed polymerase   | DNA | Enzyme (EC 2.7.7.49) which synthesizes (-)DNA on a (+)RNA template. They are encoded by the pol gene of retroviruses and by certain retrovirus-like elements.                                                                                                                                                                                                                                                                                                                                                                                                                                                                                                                | KW-0695 |
| RNA-directed polymerase   | RNA | Enzyme (EC 2.7.7.48) which synthesizes (+)RNA on a (-)RNA template. They are encoded by many viruses.                                                                                                                                                                                                                                                                                                                                                                                                                                                                                                                                                                        | KW-0696 |
| RNA repair                |     | Protein involved in the repair of RNA, the various biochemical processes by which damaged RNA can be restored.                                                                                                                                                                                                                                                                                                                                                                                                                                                                                                                                                               | KW-0692 |
| rRNA-binding              |     | Protein which binds to ribosomal RNA.                                                                                                                                                                                                                                                                                                                                                                                                                                                                                                                                                                                                                                        | KW-0699 |
| rRNA processing           |     | Protein involved in the processing of the primary rRNA transcript to yield a functional rRNA. This includes the cleavage and other modifications.                                                                                                                                                                                                                                                                                                                                                                                                                                                                                                                            | KW-0698 |
| mRNA processing           |     | Protein involved in the processing of the primary mRNA transcript to yield a functional mRNA. This includes 5' capping, 3' cleavage and polyadenylation, as well as mRNA splicing and RNA editing.                                                                                                                                                                                                                                                                                                                                                                                                                                                                           | KW-0507 |

|                        |                                                                                                                                                                                                                                                                                                                                                                                                                                                                                                                                                        |         |
|------------------------|--------------------------------------------------------------------------------------------------------------------------------------------------------------------------------------------------------------------------------------------------------------------------------------------------------------------------------------------------------------------------------------------------------------------------------------------------------------------------------------------------------------------------------------------------------|---------|
| mRNA splicing          | Protein involved in the process by which nonsense sequences or intervening sequences (introns) are removed from pre-mRNA to generate a functional mRNA (messenger RNA) that contains only exons.                                                                                                                                                                                                                                                                                                                                                       | KW-0508 |
| mRNA transport         | Protein which is involved in the mechanism of export of mRNAs from the nucleus to the cytoplasm.                                                                                                                                                                                                                                                                                                                                                                                                                                                       | KW-0509 |
| tRNA-binding           | Protein which binds transfer RNA, for example some ribosomal proteins or some aminoacyl-tRNA synthetases.                                                                                                                                                                                                                                                                                                                                                                                                                                              | KW-0820 |
| tRNA processing        | Protein involved in the processing of the primary tRNA transcript to yield a functional tRNA. Transcription of tRNA genes results in a large precursor molecule which may even contain sequences for several tRNA molecules. This primary transcript is subsequently processed by cleavage and by modification of the appropriate bases.                                                                                                                                                                                                               | KW-0819 |
| Ribonucleoprotein      | Proteins conjugated with ribonucleic acid (RNA). Ribonucleoproteins are involved in a wide range of cellular processes. Besides ribosomes, in eukaryotic cells both initial RNA transcripts in the nucleus (hnRNA) and cytoplasmic mRNAs exist as complexes with specific sets of proteins. Processing (splicing) of the former is carried out by small nuclear RNPs (snRNPs). Other examples are the signal recognition particle responsible for targetting proteins to endoplasmic reticulum and a complex involved in termination of transcription. | KW-0687 |
| Ribosomal protein      | Protein of the ribosome, large ribonucleoprotein particles where the translation of messenger RNA (mRNA) into protein occurs. They are both free in the cytoplasm and attached to membranes of eukaryotic and prokaryotic cells. Ribosomes are also present in all plastids and mitochondria, where they translate organelle-encoded mRNA.                                                                                                                                                                                                             | KW-0689 |
| Viral genome packaging | Protein involved in actively packaging the replicated viral genome into a protective shell or envelope. Such packaging proteins are present for example in adenoviruses, herpesviruses and tailed bacteriophages. In bacteriophages, the packaging proteins complex is involved in recognizing and selecting a neo-synthesized viral genome in order to translocate it into a pre-assembled empty capsid. DNA cleavage is sometimes coupled to genome packaging as well as maturation steps that induce structural changes in the assembled capsid.    | KW-0231 |
| Viral RNA replication  | Viral protein involved in the SYNthesis of multiple copies of the viral RNA genome. The replicated genomes provide support for further viral transcription or are assembled into progeny virions.                                                                                                                                                                                                                                                                                                                                                      | KW-0693 |
| Ribosome biogenesis    | Protein involved in the synthesis of ribosomes.                                                                                                                                                                                                                                                                                                                                                                                                                                                                                                        | KW-0690 |
| Nucleotide-binding     | Protein which binds a nucleotide, a phosphate ester of a nucleoside consisting of a purine or pyrimidine base linked to ribose or deoxyribose phosphates.                                                                                                                                                                                                                                                                                                                                                                                              | KW-0547 |

Table S5: **QuickGO terms used to remove nucleotide-binding associated proteins.**

| QuickGO term       | Definition                                                                                                                                                                                                              | ID         |
|--------------------|-------------------------------------------------------------------------------------------------------------------------------------------------------------------------------------------------------------------------|------------|
| RNA binding        | Interacting selectively and non-covalently with an RNA molecule or a portion thereof.                                                                                                                                   | GO:0003723 |
| DNA binding        | Any molecular function by which a gene product interacts selectively and non-covalently with DNA (deoxyribonucleic acid).                                                                                               | GO:0003677 |
| nucleotide binding | Interacting selectively and non-covalently with a nucleotide, any compound consisting of a nucleoside that is esterified with (ortho)phosphate or an oligophosphate at any hydroxyl group on the ribose or deoxyribose. | GO:0000166 |

Table S6: **Pfam domains associated with RNA, DNA or nucleotide-binding.** The table contains 526 HMM models, e.g. domains, from the Pfam data base. We include models where (1) the description matches the pattern "RNA binding/recognition or processing", (2) the PDB identifier of the PDB-Pfam mapping is annotated as RBD, (3) annotated RBDs from QuickGO and (4) classical RBDs from literature. We apply the domain-based prediction in two different modes. In the data collection pipeline we include all models to ensure the removal of all potential RBPs. However, the set contains a lot of false positive matches as we include putative RBDs. In the second mode we apply a more conservative set of models (219 bold marked Pfam domains) for predicting RBPs based on Pfam domains, excluding putative RBDs.

| Pfam ID        | Pfam name       | Pfam ID        | Pfam name       | Pfam ID        | Pfam name         |
|----------------|-----------------|----------------|-----------------|----------------|-------------------|
| <b>PF00009</b> | GTP_EFTU        | <b>PF00013</b> | KH.1            | PF00023        | Ank               |
| <b>PF00035</b> | dsrm            | PF00047        | ig              | PF00069        | Pkinase           |
| PF00075        | RNase_H         | <b>PF00076</b> | RRM_1           | PF00078        | RVT_1             |
| <b>PF00096</b> | zf-C2H2         | PF00098        | zf-CCHC         | <b>PF00133</b> | tRNA-synt_1       |
| PF00134        | Cyclin_N        | PF00136        | DNA_pol_B       | PF00140        | Sigma70_r1_2      |
| PF00152        | tRNA-synt_2     | <b>PF00163</b> | Ribosomal_S4    | PF00164        | Ribosomal_S12_S23 |
| PF00169        | PH              | PF00177        | Ribosomal_S7    | <b>PF00181</b> | Ribosomal_L2      |
| PF00189        | Ribosomal_S3_C  | PF00203        | Ribosomal_S19   | PF00237        | Ribosomal_L22     |
| PF00238        | Ribosomal_L14   | PF00252        | Ribosomal_L16   | PF00253        | Ribosomal_S14     |
| <b>PF00270</b> | DEAD            | PF00271        | Helicase_C      | PF00276        | Ribosomal_L23     |
| PF00281        | Ribosomal_L5    | PF00297        | Ribosomal_L3    | <b>PF00298</b> | Ribosomal_L11     |
| PF00312        | Ribosomal_S15   | <b>PF00313</b> | CSD             | PF00318        | Ribosomal_S2      |
| PF00327        | Ribosomal_L30   | <b>PF00333</b> | Ribosomal_S5    | PF00338        | Ribosomal_S10     |
| <b>PF00347</b> | Ribosomal_L6    | PF00366        | Ribosomal_S17   | PF00380        | Ribosomal_S9      |
| PF00398        | RrnaAD          | PF00400        | WD40            | PF00410        | Ribosomal_S8      |
| PF00411        | Ribosomal_S11   | <b>PF00416</b> | Ribosomal_S13   | PF00444        | Ribosomal_L36     |
| <b>PF00445</b> | Ribonuclease_T2 | PF00448        | SRP54           | <b>PF00453</b> | Ribosomal_L20     |
| PF00466        | Ribosomal_L10   | PF00467        | KOW             | PF00468        | Ribosomal_L34     |
| PF00471        | Ribosomal_L33   | PF00472        | RF-1            | <b>PF00536</b> | SAM_1             |
| PF00542        | Ribosomal_L12   | <b>PF00545</b> | Ribonuclease    | PF00562        | RNA_pol_Rpb2_6    |
| PF00563        | EAL             | PF00572        | Ribosomal_L13   | PF00573        | Ribosomal_L4      |
| <b>PF00575</b> | S1              | PF00587        | tRNA-synt_2b    | <b>PF00588</b> | SpoU_methylase    |
| <b>PF00598</b> | Flu_M1          | <b>PF00600</b> | Flu_NS1         | <b>PF00603</b> | Flu_PA            |
| <b>PF00604</b> | Flu_PB2         | PF00615        | RGS             | PF00623        | RNA_pol_Rpb1_2    |
| PF00631        | G-gamma         | <b>PF00636</b> | Ribonuclease_3  | PF00641        | zf-RanBP          |
| PF00642        | zf-CCCH         | <b>PF00658</b> | PABP            | PF00673        | Ribosomal_L5_C    |
| PF00679        | EFG_C           | <b>PF00680</b> | RdRP_1          | PF00687        | Ribosomal_L1      |
| PF00707        | IF3_C           | <b>PF00749</b> | tRNA-synt_1c    | PF00753        | Lactamase_B       |
| <b>PF00806</b> | PUF             | <b>PF00825</b> | Ribonuclease_P  | PF00827        | Ribosomal_L15e    |
| PF00828        | Ribosomal_L18e  | PF00829        | Ribosomal_L21p  | PF00830        | Ribosomal_L28     |
| PF00831        | Ribosomal_L29   | PF00832        | Ribosomal_L39   | PF00833        | Ribosomal_S17e    |
| PF00843        | Arena_nucleocap | <b>PF00849</b> | PseudoU_synth_2 | PF00861        | Ribosomal_L18p    |
| <b>PF00874</b> | PRD             | PF00886        | Ribosomal_S16   | PF00900        | Ribosomal_S4e     |
| <b>PF00910</b> | RNA_helicase    | PF00922        | Phosphoprotein  | PF00929        | RNase_T           |
| PF00935        | Ribosomal_L44   | PF00945        | Rhabdo_ncap     | <b>PF00949</b> | Peptidase_S7      |
| <b>PF00978</b> | RdRP_2          | <b>PF00981</b> | Rota_NS53       | <b>PF00998</b> | RdRP_3            |
| PF01000        | RNA_pol_A_bac   | <b>PF01005</b> | Flavi_NS2A      | PF01015        | Ribosomal_S3Ae    |
| PF01016        | Ribosomal_L27   | PF01020        | Ribosomal_L40e  | <b>PF01021</b> | TYA               |
| <b>PF01029</b> | NusB            | PF01084        | Ribosomal_S18   | PF01090        | Ribosomal_S19e    |
| PF01092        | Ribosomal_S6e   | PF01096        | TFIIS_C         | <b>PF01132</b> | EFP               |
| PF01135        | PCMT            | PF01138        | RNase_PH        | <b>PF01142</b> | TruD              |
| PF01157        | Ribosomal_L21e  | PF01158        | Ribosomal_L36e  | PF01159        | Ribosomal_L6e     |
| PF01161        | PBP             | PF01165        | Ribosomal_S21   | <b>PF01176</b> | eIF-1a            |
| PF01191        | RNA_pol_Rpb5_C  | PF01192        | RNA_pol_Rpb6    | PF01193        | RNA_pol_L         |
| PF01194        | RNA_pol_N       | PF01196        | Ribosomal_L17   | PF01197        | Ribosomal_L31     |
| PF01198        | Ribosomal_L31e  | PF01199        | Ribosomal_L34e  | PF01200        | Ribosomal_S28e    |
| PF01201        | Ribosomal_S8e   | PF01202        | SKI             | PF01245        | Ribosomal_L19     |
| PF01246        | Ribosomal_L24e  | PF01247        | Ribosomal_L35Ae | PF01248        | Ribosomal_L7Ae    |
| PF01249        | Ribosomal_S21e  | <b>PF01250</b> | Ribosomal_S6    | PF01251        | Ribosomal_S7e     |
| PF01253        | SUI1            | <b>PF01269</b> | Fibrillarin     | PF01272        | GreA_GreB         |
| PF01280        | Ribosomal_L19e  | PF01281        | Ribosomal_L9_N  | PF01282        | Ribosomal_S24e    |
| PF01283        | Ribosomal_S26e  | <b>PF01287</b> | eIF-5a          | PF01294        | Ribosomal_L13e    |
| <b>PF01300</b> | Sua5_yciO_yrdC  | <b>PF01336</b> | tRNA_anti-codon | PF01351.14     | RNase_HII         |
| PF01378        | IgG_binding_B   | PF01386        | Ribosomal_L25p  | PF01399        | PCI               |
| <b>PF01409</b> | tRNA-synt_2d    | <b>PF01416</b> | PseudoU_synth_1 | <b>PF01423</b> | LSM               |
| <b>PF01472</b> | PUA             | <b>PF01479</b> | S4              | <b>PF01480</b> | PWI               |
| PF01509        | TruB_N          | <b>PF01517</b> | HDV_ag          | <b>PF01518</b> | PolyG_pol         |
| <b>PF01588</b> | tRNA_bind       | PF01599        | Ribosomal_S27   | PF01632        | Ribosomal_L35p    |

|                |                 |                |                 |                |                 |
|----------------|-----------------|----------------|-----------------|----------------|-----------------|
| <b>PF01649</b> | Ribosomal_S20p  | <b>PF01652</b> | IF4E            | PF01655        | Ribosomal_L32e  |
| PF01656        | CbiA            | <b>PF01660</b> | Vmethyltransf   | PF01661        | Macro           |
| <b>PF01665</b> | Rota_NSP3       | PF01667        | Ribosomal_S27e  | <b>PF01668</b> | SmpB            |
| PF01693        | Cauli_VI        | PF01728        | FtsJ            | <b>PF01743</b> | PolyA_pol       |
| <b>PF01746</b> | tRNA_m1G_MT     | PF01765        | RRF             | PF01775        | Ribosomal_L18ae |
| PF01776        | Ribosomal_L22e  | PF01777        | Ribosomal_L27e  | PF01779        | Ribosomal_L29e  |
| PF01780        | Ribosomal_L37ae | PF01781        | Ribosomal_L38e  | PF01783        | Ribosomal_L32p  |
| <b>PF01787</b> | llar_coat       | PF01796        | OB_aCoA_assoc   | <b>PF01798</b> | Nop             |
| <b>PF01805</b> | Surp            | <b>PF01806</b> | Paramyxo_P      | <b>PF01818</b> | Translat_reg    |
| PF01829        | Peptidase_A6    | <b>PF01868</b> | UPF0086         | <b>PF01877</b> | RNA_binding     |
| PF01878        | EVE             | PF01907        | Ribosomal_L37e  | PF01909        | NTP_transf_2    |
| PF01918        | Alba            | <b>PF01922</b> | SRP19           | PF01926        | MMR_HSR1        |
| PF01929        | Ribosomal_L14e  | PF01938        | TRAM            | PF01978        | TrmB            |
| <b>PF01985</b> | CRS1_YhbY       | <b>PF02005</b> | TRM             | PF02037        | SAP             |
| <b>PF02081</b> | TrpBP           | PF02097        | Filo_VP35       | <b>PF02123</b> | RdRP_4          |
| <b>PF02137</b> | A_deamin        | PF02150        | RNA_POL_M_15KD  | <b>PF02170</b> | PAZ             |
| <b>PF02171</b> | Piwi            | PF02198        | SAM_PNT         | <b>PF02290</b> | SRP14           |
| <b>PF02295</b> | z-alpha         | PF02492        | cobW            | <b>PF02509</b> | Rota_NS35       |
| PF02568        | ThiI            | <b>PF02599</b> | CsrA            | PF02609        | Exonuc_VIIS     |
| PF02792        | Mago_nashi      | <b>PF02854</b> | MIF4G           | PF02881        | SRP54_N         |
| PF02912        | Phe_tRNA-synt_N | <b>PF02926</b> | THUMP           | <b>PF02978</b> | SRP_SPB         |
| PF03104        | DNA_pol_B_exo1  | <b>PF03123</b> | CAT_RBD         | PF03129        | HGTP_anticodon  |
| PF03143        | GTP_EFTU_D3     | PF03144        | GTP_EFTU_D2     | <b>PF03147</b> | FDX-ACB         |
| PF03193        | DUF258          | PF03205        | MobB            | <b>PF03246</b> | Pneumo_ncap     |
| PF03297        | Ribosomal_S25   | <b>PF03368</b> | Dicer_dimer     |                |                 |
| PF03462        | PCRf            | PF03463        | eRF1_L1         | PF03464        | eRF1_L2         |
| PF03465        | eRF1_3          | PF03467        | Smg4_UPF3       | PF03468        | XS              |
| <b>PF03483</b> | B3_4            | <b>PF03484</b> | B5              | PF03501        | S10_plectin     |
| PF03566        | Peptidase_A21   | PF03604        | DNA_RNApol_7kD  | PF03719        | Ribosomal_S5_C  |
| PF03725        | RNase_PH_C      | <b>PF03726</b> | PNPase          | PF03764        | EFG_IV          |
| PF03828        | PAP_assoc       | <b>PF03854</b> | zf-P11          | <b>PF03861</b> | ANTAR           |
| PF03870        | RNA_pol_Rpb8    | PF03871        | RNA_pol_Rpb5_N  | PF03874        | RNA_pol_Rpb4    |
| PF03876        | SHS2_Rpb7-N     | <b>PF03880</b> | DbpA            | PF03919        | mRNA_cap_C      |
| PF03939        | Ribosomal_L23eN | PF03946        | Ribosomal_L11_N | PF03947        | Ribosomal_L2_C  |
| PF03948        | Ribosomal_L9_C  | <b>PF03950</b> | tRNA-synt_1c_C  | PF03979        | Sigma70_r1.1    |
| <b>PF04059</b> | RRM_2           | <b>PF04135</b> | Nop10p          | PF04146        | YTH             |
| PF04266        | ASCH            | PF04280        | Tim44           | PF04378        | RsmJ            |
| <b>PF04410</b> | Gar1            | PF04452        | Methyltrans.RNA | <b>PF04514</b> | BTV_NS2         |
| <b>PF04522</b> | DUF585          | PF04539        | Sigma70_r3      | PF04542        | Sigma70_r2      |
| PF04546        | Sigma70_ner     | PF04548        | AIG1            | <b>PF04557</b> | tRNA_synt_1c_R2 |
| <b>PF04558</b> | tRNA_synt_1c_R1 | PF04560        | RNA_pol_Rpb2_7  | PF04561        | RNA_pol_Rpb2_2  |
| PF04563        | RNA_pol_Rpb2_1  | PF04565        | RNA_pol_Rpb2_3  | PF04566        | RNA_pol_Rpb2_4  |
| PF04567        | RNA_pol_Rpb2_5  | PF04758        | Ribosomal_S30   | <b>PF04774</b> | HABP4_PAIRBPI   |
| <b>PF04818</b> | CTD.bind        | <b>PF04845</b> | PurA            | <b>PF04847</b> | Calcipressin    |
| PF04851        | ResIII          | <b>PF04857</b> | CAF1            | <b>PF04926</b> | PAP_RNA-bind    |
| PF04983        | RNA_pol_Rpb1_3  | PF04990        | RNA_pol_Rpb1_7  | PF04992        | RNA_pol_Rpb1_6  |
| PF04997        | RNA_pol_Rpb1_1  | PF04998        | RNA_pol_Rpb1_5  | PF05000        | RNA_pol_Rpb1_4  |
| <b>PF0502</b>  | DCP2            | PF05046        | Img2            | PF05047        | L51_S25_CI-B8   |
| <b>PF05087</b> | Rota_VP2        | PF05162        | Ribosomal_L41   | <b>PF05172</b> | Nup35_RRM       |
| <b>PF05383</b> | La              | <b>PF05413</b> | Peptidase_C34   | PF05470        | eIF-3c_N        |
| PF05486        | SRP9-21         | <b>PF05634</b> | APO_RNA-bind    | PF05697        | Trigger_N       |
| <b>PF05731</b> | TROVE           | <b>PF05733</b> | Tenui_N         | <b>PF05741</b> | zf-nanos        |
| <b>PF05746</b> | DALR_1          | <b>PF05788</b> | Orbi_VP1        | <b>PF05890</b> | Ebp2            |
| <b>PF06003</b> | SMN             | PF06220        | zf-U1           | PF06293        | Kdo             |
| PF06414        | Zeta_toxin      | PF06467        | zf-FCS          | <b>PF06478</b> | Corona_RPol_N   |
| PF06479        | Ribonuc_2-5A    | PF06747        | CHCH            | PF06815        | RVT_connect     |
| PF06817        | RVT_thumb       | PF06984        | MRP-L47         | <b>PF06991</b> | MFAP1           |
| PF07147        | PDCD9           | PF07296        | TraP            | PF07447        | VP40            |
| <b>PF07497</b> | Rho_RNA_bind    | PF07498        | Rho_N           | PF07500        | TFIIS_M         |
| PF07521        | RMMBL           | <b>PF07541</b> | EIF_2_alpha     | PF07647        | SAM_2           |
| <b>PF07650</b> | KH_2            | PF07654        | C1-set          | PF07679        | I-set           |
| PF07686        | V-set           | PF07714        | Pkinase_Tyr     | <b>PF07717</b> | OB_NTP_bind     |
| <b>PF07925</b> | RdRP_5          | <b>PF08032</b> | SpoU_sub_bind   | PF08069        | Ribosomal_S13_N |
| PF08071        | RS4NT           | PF08079        | Ribosomal_L30_N | PF08080        | zf-RNPHF        |
| <b>PF08144</b> | CPL             | <b>PF08147</b> | DBP10CT         | <b>PF08152</b> | GUCT            |
| <b>PF08167</b> | RIX1            | <b>PF08190</b> | PIH1            | PF08205        | C2-set_2        |
| PF08206        | OB.RNB          | PF08213        | DUF1713         | PF08228        | RNase_P_pop3    |
| <b>PF08264</b> | Anticodon_1     | <b>PF08289</b> | Flu_M1_C        | PF08292        | RNA_pol_Rbc25   |
| PF08293        | MRP-S33         | PF08433        | KTI12           | <b>PF08492</b> | SRP72           |
| <b>PF08517</b> | AXH             | <b>PF08524</b> | rRNA_processing | PF08561        | Ribosomal_L37   |
| <b>PF08572</b> | PRP3            | PF08662        | eIF2A           | <b>PF08675</b> | RNA_bind        |

|                |                 |                |                 |                |                   |
|----------------|-----------------|----------------|-----------------|----------------|-------------------|
| <b>PF08698</b> | Fcf2            | PF08699        | ArgoL1          | <b>PF08710</b> | nsp9              |
| <b>PF08777</b> | RRM_3           | PF08798        | CRISPR_assoc    | <b>PF08799</b> | PRP4              |
| <b>PF08845</b> | SymE_toxin      | <b>PF09000</b> | Cytotoxic       | PF09105        | SelB-wing_1       |
| <b>PF09106</b> | SelB-wing_2     | <b>PF09107</b> | SelB-wing_3     | <b>PF09142</b> | TruB_C            |
| <b>PF09157</b> | TruB-C_2        | <b>PF09162</b> | Tap-RNA_bind    | PF09173        | eIF2_C            |
| <b>PF09190</b> | DALR_2          | PF09235        | Ste50p-SAM      | <b>PF09246</b> | PHAT              |
| <b>PF09334</b> | tRNA-synt_1g    | <b>PF09387</b> | MRP             | <b>PF09401</b> | NSP10             |
| PF09405        | Btz             | PF09598        | Stm1_N          | <b>PF09738</b> | DUF2051           |
| PF09776        | Mitoc_L55       | PF09809        | MRP-L27         | PF09812        | MRP-L28           |
| <b>PF10133</b> | RNA_bind_2      | PF10147        | CR6_interact    | <b>PF10150</b> | RNase_E_G         |
| PF10210        | MRP-S32         | PF10213        | MRP-S28         | PF10236        | DAP3              |
| PF10244        | MRP-L51         | PF10245        | MRP-S22         | PF10246        | MRP-S35           |
| <b>PF10258</b> | RNA_GG_bind     | <b>PF10273</b> | WGG             | PF10283        | zf-CCHH           |
| <b>PF10288</b> | CTU2            | <b>PF10373</b> | EST1_DNA_bind   | PF10385        | RNA_pol_Rpb2_45   |
| <b>PF10447</b> | EXOSC1          | <b>PF10458</b> | Val_tRNA-synt_C | <b>PF10477</b> | EIF4E-T           |
| PF10484        | MRP-S23         | PF10501        | Ribosomal_L50   | <b>PF10567</b> | Nab6_mRNP_bdg     |
| <b>PF10597</b> | U5_2-snRNA_bdg  | <b>PF10598</b> | RRM_4           | PF10780        | MRP_L53           |
| <b>PF10789</b> | Phage_RpbA      | PF10996        | Beta-Casp       | <b>PF11435</b> | She2p             |
| PF11438        | N36             | <b>PF11473</b> | B2              | PF11648        | RIG-I_C-RD        |
| <b>PF11717</b> | Tudor_knot      | <b>PF11718</b> | CPSF73-100_C    | PF11788        | MRP-L46           |
| <b>PF11955</b> | PORR            | <b>PF11969</b> | DcpS_C          | <b>PF12009</b> | Telomerase_RBD    |
| <b>PF12171</b> | zf-C2H2_jaz     | <b>PF12212</b> | PAZ_siRNAbind   | PF12220        | U1snRNP70_N       |
| <b>PF12235</b> | FXMRP1_C_core   | PF12328        | Rpp20           | <b>PF12627</b> | PolyA_pol_RNAbd   |
| PF12701        | LSM14           | PF12706        | Lactamase_B_2   | <b>PF12745</b> | HGTP_anticonodon2 |
| PF12796        | Ank_2           | PF12862        | ANAPC5          | PF12869        | tRNA_anti-like    |
| PF12872        | OST-HTH         | <b>PF12923</b> | RRP7            | PF12961        | DUF3850           |
| <b>PF13014</b> | KH_3            | PF13017        | Maelstrom       | <b>PF13083</b> | KH_4              |
| PF13086        | AAA_11          | PF13087        | AAA_12          | <b>PF13184</b> | KH_5              |
| <b>PF13234</b> | rRNA_proc-arch  | PF13238        | AAA_18          | PF13245        | AAA_19            |
| PF13395        | HNH_4           | <b>PF13397</b> | RbpA            | PF13509        | S1_2              |
| PF13543        | KSR1-SAM        | PF13603        | tRNA-synt_1_2   | <b>PF13636</b> | Noll_Nop2_Fmu_2   |
| PF13637        | Ank_4           | PF13656        | RNA_pol_L_2     | PF13671        | AAA_33            |
| PF13680        | DUF4152         | <b>PF13725</b> | tRNA_bind_2     | <b>PF13742</b> | tRNA_anti_2       |
| PF13857        | Ank_5           | PF13869        | NUDIX_2         | <b>PF13893</b> | RRM_5             |
| PF13895        | Ig_2            | PF13927        | Ig_3            | <b>PF13958</b> | ToxN_toxin        |
| PF14204        | Ribosomal_L18_c | <b>PF14259</b> | RRM_6           | PF14306        | PUA_2             |
| PF14374        | Ribos_L4_asso_C | PF14392        | zf-CCHC_4       | PF14438        | SM-ATX            |
| <b>PF14444</b> | S1-like         | PF14492        | EFG_II          | PF14580        | LRR_9             |
| <b>PF14608</b> | zf-CCHC_2       | <b>PF14622</b> | Ribonucleas_3_3 | PF14693        | Ribosomal_TL5_C   |
| <b>PF14709</b> | DND1_DSRM       | PF14943        | MRP-S26         | PF14955        | MRP-S24           |
| PF14978        | MRP-63          | <b>PF15247</b> | SLBP_RNA_bind   | <b>PF15313</b> | HEXIM             |
| <b>PF15320</b> | RAM             | PF15433        | MRP-S31         | <b>PF15608</b> | PELOTA_1          |
| <b>PF15777</b> | Anti-TRAP       | <b>PF15801</b> | zf-C6H2         | <b>PF15985</b> | KH_6              |
| <b>PF16005</b> | MOEP19          | <b>PF16367</b> | RRM_7           | <b>PF16482</b> | Staufen_C         |
| <b>PF16520</b> | BDV_M           | <b>PF16651</b> | RRM_u2          | <b>PF16780</b> | AIMP2_LysRS_bd    |
| <b>PF16842</b> | RRM_occluded    | <b>PF16852</b> | HHV-1_VABD      | <b>PF16969</b> | SRP68             |
| <b>PF14605</b> | Nup35_RRM_2     |                |                 |                |                   |

## 2.3 Feature Selection

Table S7: **Important tripeptides from the human SVM model.** The top 50 important tripeptides from the human SVM model, i.e. the ones that contributed the most to the classification of human proteins into RBPs versus non-RBPs are ranked according to their absolute value of the SVM weight, computed as described in the Method section.

| Tripeptide | frequency in disordered regions of RBPs | SVM weight |
|------------|-----------------------------------------|------------|
| LLL        | 0.075                                   | -2.83      |
| GKT        | 0.24                                    | 2.63       |
| LLK        | 0.13                                    | 2.33       |

|     |       |       |
|-----|-------|-------|
| KNL | 0.17  | 2.11  |
| CGK | 0.067 | 2.09  |
| MAA | 0.25  | 1.84  |
| LLF | 0.07  | -1.79 |
| RAG | 0.26  | 1.79  |
| KAV | 0.24  | 1.77  |
| GRG | 0.73  | 1.74  |
| SAF | 0.21  | -1.70 |
| KKK | 0.62  | 1.69  |
| KRK | 0.62  | 1.68  |
| SKL | 0.25  | -1.68 |
| IKL | 0.20  | 1.67  |
| EEE | 0.68  | 1.67  |
| KGG | 0.40  | 1.65  |
| RGG | 0.75  | 1.63  |
| ELE | 0.43  | -1.62 |
| LKR | 0.30  | 1.58  |
| TGS | 0.42  | 1.57  |
| PYG | 0.44  | 1.56  |
| KNK | 0.45  | 1.55  |
| AIK | 0.18  | 1.55  |
| FQE | 0.21  | -1.54 |
| RRI | 0.21  | 1.54  |
| VLF | 0.04  | -1.53 |
| RSR | 0.79  | 1.52  |
| KKL | 0.28  | 1.51  |
| GAK | 0.35  | 1.50  |
| KLQ | 0.28  | -1.50 |
| KKG | 0.41  | 1.50  |
| KVG | 0.23  | 1.49  |
| YGR | 0.26  | 1.48  |
| EIL | 0.14  | 1.48  |
| DIV | 0.09  | 1.47  |
| KEG | 0.27  | 1.47  |
| RTV | 0.22  | 1.46  |
| LAG | 0.23  | -1.44 |
| DAK | 0.33  | 1.44  |
| EAE | 0.55  | -1.43 |
| VKL | 0.15  | 1.41  |
| IGK | 0.15  | 1.39  |
| FIL | 0.12  | -1.39 |
| SKK | 0.54  | 1.39  |
| FET | 0.20  | 1.39  |
| EAA | 0.35  | 1.39  |
| VYK | 0.10  | 1.38  |
| DFL | 0.12  | -1.38 |
| KKR | 0.57  | 1.37  |



Table S8: **Important tripeptides from the *Salmonella* SVM model.** The top 50 important tripeptides from the *Salmonella* SVM model, i.e. the ones that contributed the most to the classification of *Salmonella* proteins into RBPs versus non-RBPs are ranked according to their absolute value of the SVM weight, computed as described in the Method section.

| Tripeptide | frequency in disordered regions of RBPs | SVM weight |
|------------|-----------------------------------------|------------|
| RRL        | 0.033                                   | 1.5        |
| KVK        | 0.16                                    | 1.23       |
| RAR        | 0.06                                    | 1.17       |
| LRR        | 0                                       | 1.10       |
| SRR        | 0.13                                    | 1.09       |
| RKR        | 0.21                                    | 1.06       |
| VTV        | 0.04                                    | 1.05       |
| VKI        | 0                                       | 1.04       |
| KRK        | 0.18                                    | 1.03       |
| LTA        | 0.05                                    | -1.03      |
| LGQ        | 0                                       | 0.98       |
| EVR        | 0.0                                     | 0.971      |
| GRL        | 0.05                                    | 0.93       |
| QLR        | 0                                       | 0.91       |
| KKG        | 0.22                                    | 0.90       |
| KTR        | 0.15                                    | 0.89       |
| KAK        | 0.32                                    | 0.89       |
| AGL        | 0                                       | -0.88      |
| RKT        | 0.19                                    | 0.88       |
| KVE        | 0.06                                    | 0.88       |
| ELE        | 0.11                                    | 0.88       |
| RLL        | 0.012                                   | 0.88       |
| KRT        | 0.17                                    | 0.87       |
| RFV        | 0                                       | 0.86       |
| GLA        | 0.032                                   | -0.85      |
| GKV        | 0.16                                    | 0.84       |
| VEL        | 0.04                                    | 0.84       |
| PVL        | 0.083                                   | -0.83      |
| SAL        | 0.04                                    | 0.83       |
| PGA        | 0.11                                    | 0.82       |
| VVE        | 0.21                                    | 0.82       |
| KLQ        | 0                                       | 0.82       |
| LLL        | 0.02                                    | -0.82      |
| ERG        | 0                                       | 0.80       |
| LKG        | 0.04                                    | 0.80       |
| DDA        | 0.07                                    | -0.80      |
| SGK        | 0.2                                     | 0.80       |
| PFL        | 0                                       | 0.79       |
| ASL        | 0                                       | -0.79      |

|     |      |       |
|-----|------|-------|
| IGA | 0    | -0.79 |
| LKR | 0.05 | 0.79  |
| NKL | 0.07 | 0.78  |
| VFG | 0    | 0.78  |
| GRG | 0.09 | 0.77  |
| RGL | 0.02 | 0.77  |
| KIS | 0    | 0.77  |
| IKK | 0.18 | 0.77  |
| RER | 0.16 | 0.76  |
| RDG | 0.07 | -0.76 |
| GVL | 0    | 0.75  |
